# Supplementary figures and images for: Heterologous Booster with BNT162b2 Induced High Specific Antibody Levels in CoronaVac Vaccinees
Source: MDPI journal article supplement (doi:10.3390/vaccines11071183), 2023-06-30

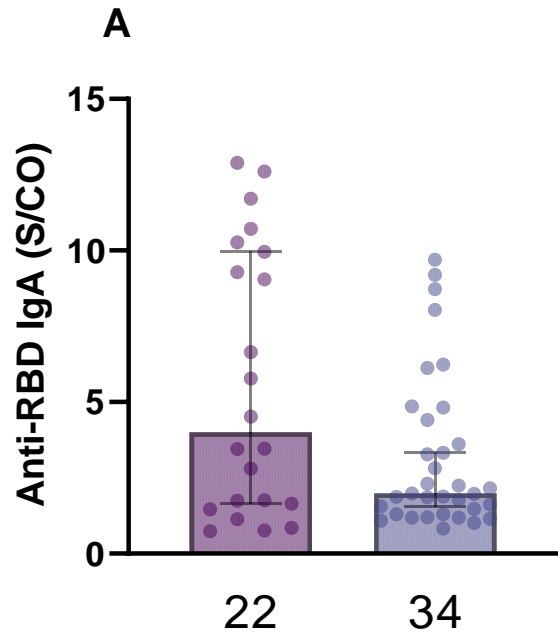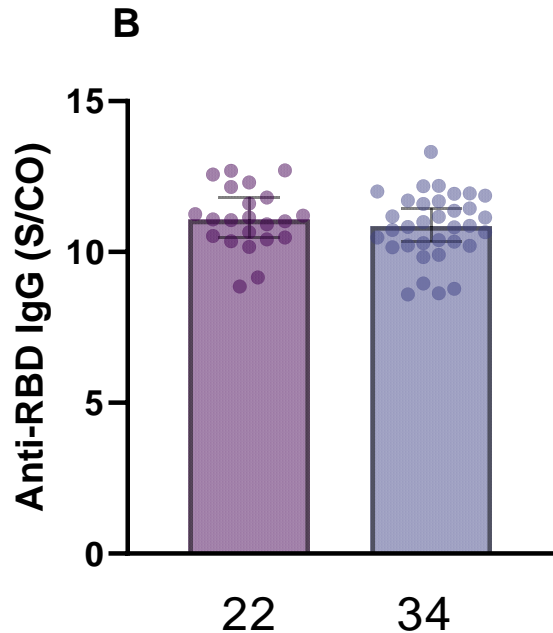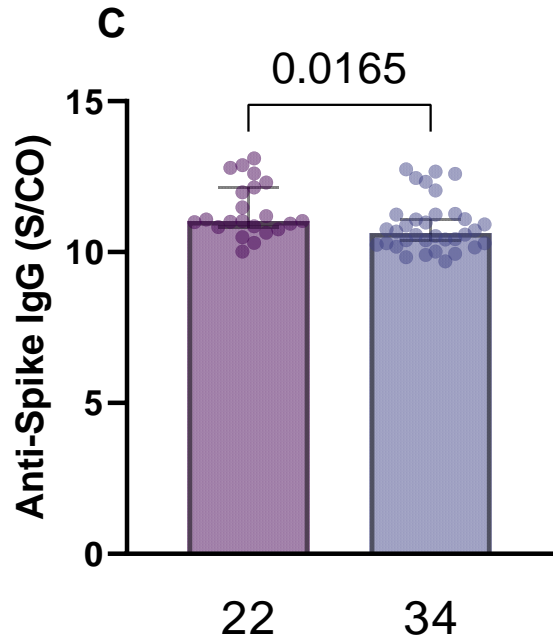

Supplement: s1 [file s1]

## Total vaccines

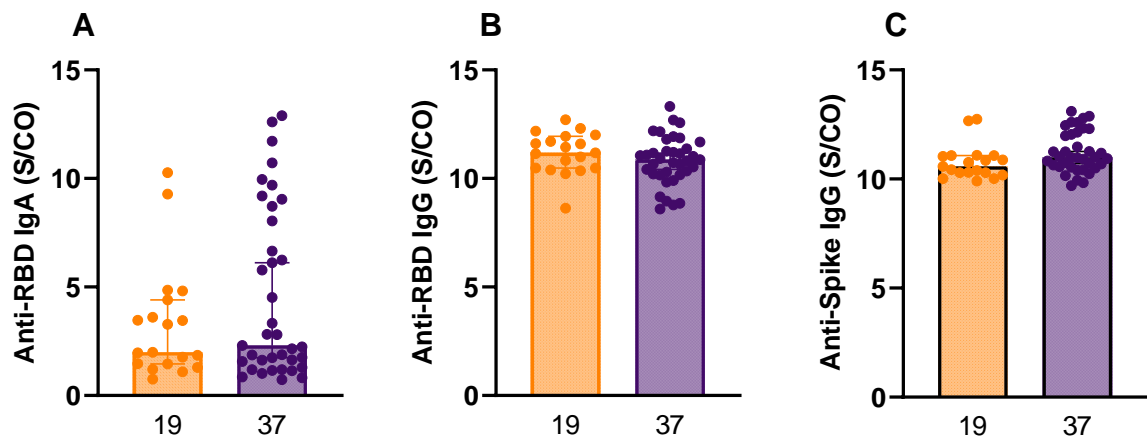

## ChAdOx1 nCoV-19

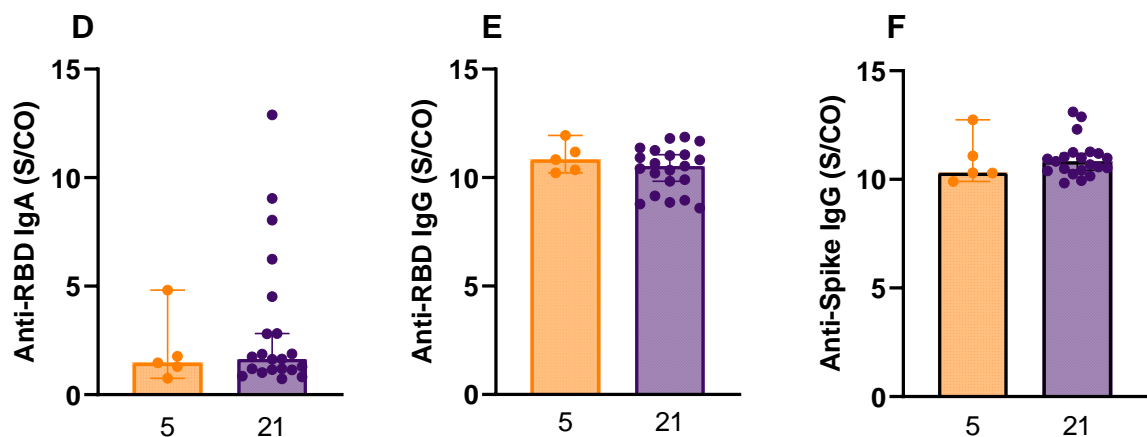

## BNT162b2

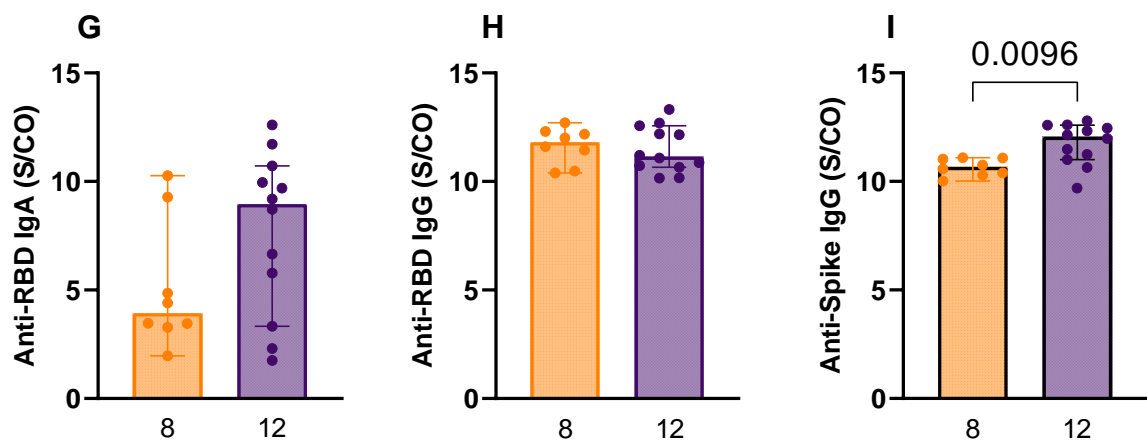

## CoronaVac

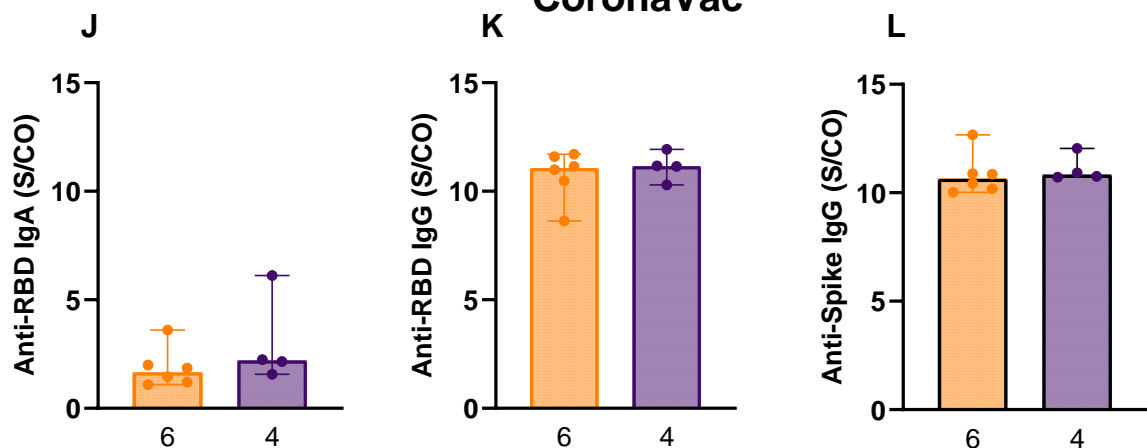

Supplement: s1 [file s1]

## Pre-vaccine

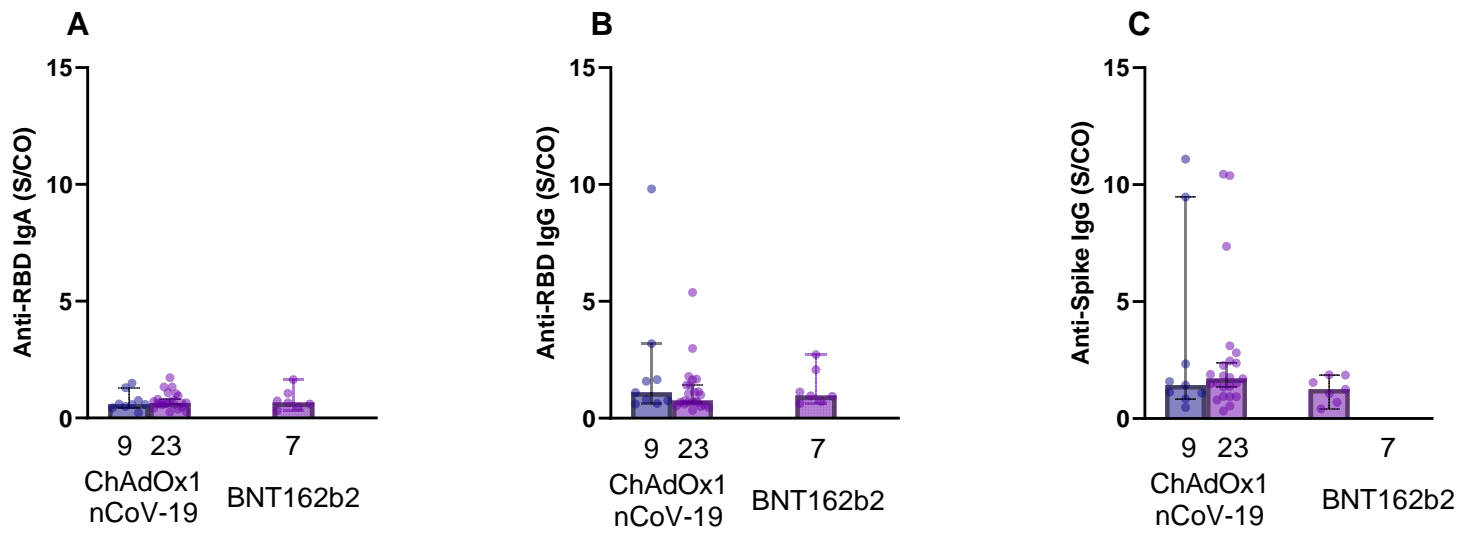

## 1 month post second dose

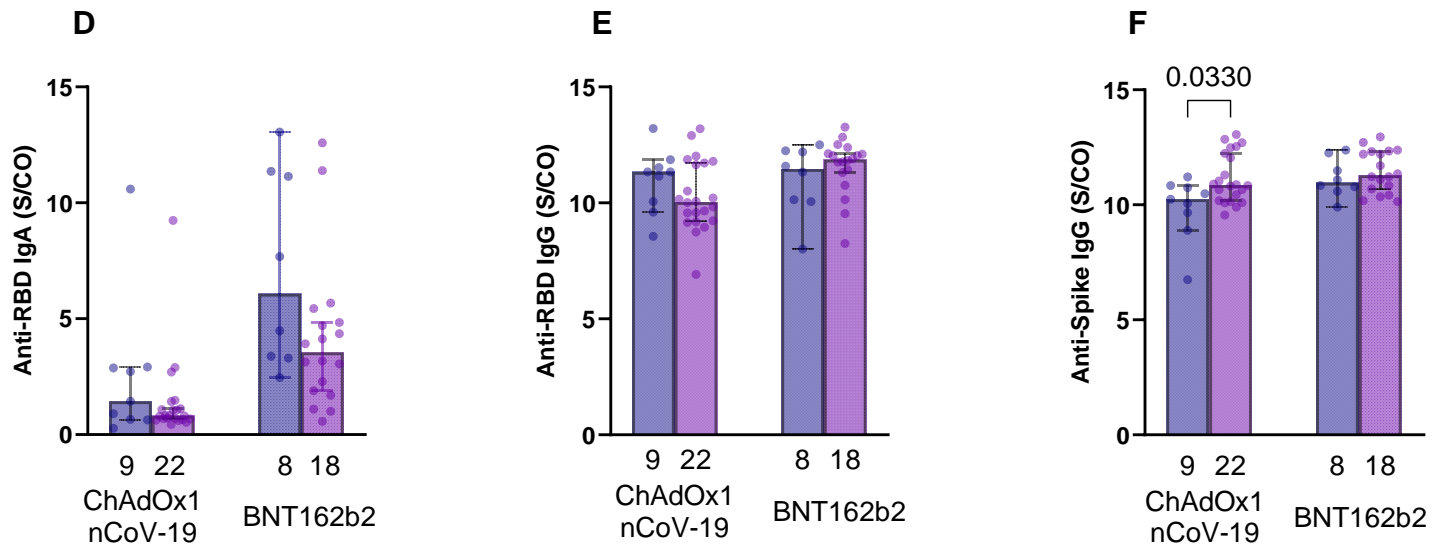

## 1 month post third dose

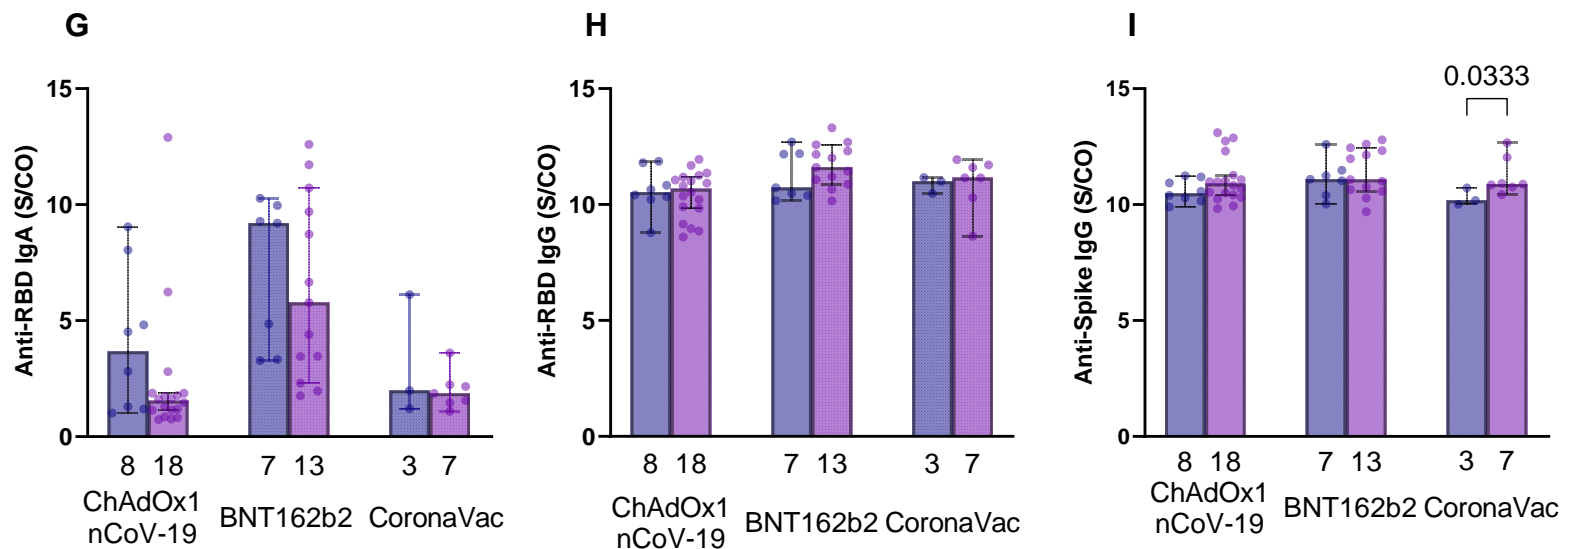

Supplement: s1 [file s1]
